# Supplementary material for: CRX directs photoreceptor differentiation by accelerating chromatin remodeling at specific target sites
Source: Epigenetics Chromatin. 2018 Aug 1;11:42. doi: 10.1186/s13072-018-0212-2 (PMC6069558; doi:10.1186/s13072-018-0212-2)
Supplement: Supplementary file 4 — Additional file 4. GO analysis describes differences in nearest gene to each regulatory site. Sheets within the table represent distinct comparisons referenced within the text. [file 13072_2018_212_MOESM4_ESM.xlsx]

## Sheet: All ATAC comparison
DOWN
# GREAT version 3.0.0	Species assembly: mm9	Association rule: Single nearest gene: 1000000000 bp max extension, curated regulatory domains included
# Term Name	Binom Rank	Binom Raw P-Value	Binom FDR Q-Val	Binom Fold Enrichment	Binom Observed Region Hits	Binom Region Set Coverage	Hyper Rank	Hyper FDR Q-Val	Hyper Fold Enrichment	Hyper Observed Gene Hits	Hyper Total Genes	Hyper Gene Set Coverage
phototransduction	8	3.09736e-25	3.89338e-22	8.68329	42	0.00915831	167	0.000107998	3.36693	17	36	0.00572391
detection of light stimulus	9	9.5549e-24	1.0676e-20	7.43241	44	0.00959442	193	0.000280094	2.94499	19	46	0.00639731
sensory perception of light stimulus	10	3.84866e-23	3.87021e-20	3.5225	89	0.0194069	139	1.61937e-05	2.33568	38	116	0.0127946
visual perception	14	1.3447e-22	9.65877e-20	3.51503	87	0.0189708	157	6.30819e-05	2.27149	36	113	0.0121212
microtubule-based process	20	1.82255e-18	9.16378e-16	2.15726	160	0.0348888	133	8.92627e-06	1.68914	95	401	0.0319865
regulation of nuclear-transcribed mRNA catabolic process, deadenylation-dependent decay	24	6.73329e-17	2.82125e-14	9.86295	25	0.00545137	247	0.00176207	4.75331	8	12	0.0026936
positive regulation of nuclear-transcribed mRNA catabolic process, deadenylation-dependent decay	30	3.77772e-16	1.26629e-13	9.72279	24	0.00523332	295	0.00709101	4.53725	7	11	0.0023569
positive regulation of mRNA catabolic process	33	1.92185e-15	5.85641e-13	8.4921	25	0.00545137	335	0.0113827	3.80265	8	15	0.0026936
retina development in camera-type eye	40	1.1981e-14	3.01202e-12	2.52726	90	0.0196249	251	0.00186856	2.01102	33	117	0.0111111
regulation of Rab GTPase activity	54	2.39599e-12	4.46187e-10	3.61619	43	0.00937636	155	4.86649e-05	3.16887	20	45	0.00673401
microtubule cytoskeleton organization	55	2.49663e-12	4.56475e-10	2.24129	94	0.0204972	267	0.00324647	1.64991	56	242	0.0188552
response to light stimulus	56	2.6186e-12	4.70227e-10	2.26201	92	0.0200611	323	0.0093875	1.65078	47	203	0.0158249
positive regulation of cellular catabolic process	58	3.57294e-12	6.19474e-10	2.69882	65	0.0141736	215	0.000633578	2.15244	32	106	0.0107744
positive regulation of catabolic process	69	5.07791e-11	7.4005e-09	2.2365	83	0.0180986	199	0.000341434	2.00225	41	146	0.0138047
fatty acid metabolic process	70	8.98956e-11	1.29141e-08	2.13103	90	0.0196249	236	0.00130035	1.70045	57	239	0.0191919
positive regulation of Rab GTPase activity	71	9.02204e-11	1.27783e-08	3.38777	40	0.0087222	173	0.000140366	3.07885	19	44	0.00639731
mitochondrion transport along microtubule	74	1.64158e-10	2.23078e-08	12.001	13	0.00283471	432	0.0399194	5.70397	4	5	0.0013468
microtubule-based movement	103	2.68459e-09	2.62099e-07	2.11494	77	0.0167902	373	0.0187646	1.67511	39	166	0.0131313
nucleocytoplasmic transport	117	5.5638e-09	4.78201e-07	2.10127	75	0.0163541	196	0.000295504	1.94454	45	165	0.0151515
cell-cell junction organization	122	7.36084e-09	6.06726e-07	2.41038	55	0.011993	171	0.000122662	2.40336	30	89	0.010101
UP
# GREAT version 3.0.0	Species assembly: mm9	Association rule: Single nearest gene: 1000000000 bp max extension, curated regulatory domains included
# Term Name	Binom Rank	Binom Raw P-Value	Binom FDR Q-Val	Binom Fold Enrichment	Binom Observed Region Hits	Binom Region Set Coverage	Hyper Rank	Hyper FDR Q-Val	Hyper Fold Enrichment	Hyper Observed Gene Hits	Hyper Total Genes	Hyper Gene Set Coverage
detection of visible light	100	2.64386e-10	2.65866e-08	5.07719	24	0.00383448	815	0.0440823	2.35011	11	27	0.00299646
Notch signaling pathway	115	1.80481e-09	1.57819e-07	2.29341	66	0.0105448	449	0.00186073	2.07664	27	75	0.00735494
oligodendrocyte cell fate specification	125	1.02905e-08	8.2785e-07	5.96362	17	0.00271609	622	0.0129667	4.80705	5	6	0.00136203
somatic motor neuron differentiation	130	1.56059e-08	1.20717e-06	7.3646	14	0.00223678	740	0.0326684	4.12033	5	7	0.00136203
peripheral nervous system development	135	2.40014e-08	1.78783e-06	2.12516	67	0.0107046	464	0.00264505	2.17499	23	61	0.00626532
neuromuscular process controlling balance	142	5.48223e-08	3.88235e-06	2.24805	56	0.00894712	724	0.0280464	1.95715	19	56	0.0051757
smoothened signaling pathway involved in dorsal/ventral neural tube patterning	156	1.67176e-07	1.07764e-05	4.62114	18	0.00287586	740	0.0326684	4.12033	5	7	0.00136203
body fluid secretion	163	3.0985e-07	1.91156e-05	2.23759	50	0.0079885	554	0.00750072	2.19201	19	50	0.0051757
regulation of timing of cell differentiation	164	3.52102e-07	2.15899e-05	3.44382	24	0.00383448	365	0.000512177	4.32634	9	12	0.00245165
regulation of development, heterochronic	167	4.2623e-07	2.56657e-05	3.40619	24	0.00383448	416	0.00123437	3.99355	9	13	0.00245165
negative regulation of osteoblast differentiation	177	8.35457e-07	4.74653e-05	2.43273	39	0.00623103	371	0.000568527	2.80182	17	35	0.00463089
parasympathetic nervous system development	179	9.67305e-07	5.4342e-05	3.46289	22	0.00351494	769	0.0362907	2.88423	8	16	0.00217924
secretion by tissue	186	1.24703e-06	6.74203e-05	2.20916	46	0.00734942	663	0.017919	2.13182	17	46	0.00463089
positive regulation of chondrocyte differentiation	189	1.36716e-06	7.27418e-05	2.81014	29	0.00463333	506	0.00507988	3.46107	9	15	0.00245165
smoothened signaling pathway	190	1.3983e-06	7.40071e-05	2.24482	44	0.00702988	539	0.00642149	2.12522	21	57	0.00572051
forebrain neuron fate commitment	194	1.52724e-06	7.91643e-05	5.00424	14	0.00223678	535	0.00646356	4.03792	7	10	0.00190684
commitment of neuronal cell to specific neuron type in forebrain	195	1.72418e-06	8.89148e-05	7.35815	10	0.0015977	639	0.0141938	5.76846	4	4	0.00108962
glial cell fate commitment	203	2.38552e-06	0.000118171	2.8509	27	0.00431379	506	0.00507988	3.46107	9	15	0.00245165
neuron maturation	213	3.97593e-06	0.000187709	2.43451	34	0.00543218	502	0.00495329	2.88423	12	24	0.00326886
regulation of Notch signaling pathway	219	5.78885e-06	0.000265811	2.23648	39	0.00623103	597	0.0110573	2.22872	17	44	0.00463089

## Sheet: Group A
Group A Dependent
# GREAT version 3.0.0	Species assembly: mm9	Association rule: Single nearest gene: 1000000000 bp max extension, curated regulatory domains included
# Term Name	Binom Rank	Binom Raw P-Value	Binom FDR Q-Val	Binom Fold Enrichment	Binom Observed Region Hits	Binom Region Set Coverage	Hyper Rank	Hyper FDR Q-Val	Hyper Fold Enrichment	Hyper Observed Gene Hits	Hyper Total Genes	Hyper Gene Set Coverage
visual perception	1	5.87609e-29	5.90899e-25	10.2672	43	0.0554124	1	1.09045e-08	6.76972	22	113	0.0361248
sensory perception of light stimulus	2	1.31461e-28	6.60986e-25	10.0578	43	0.0554124	2	9.51108e-09	6.59464	22	116	0.0361248
phototransduction	3	4.28967e-27	1.4379e-23	29.3237	24	0.0309278	6	5.33086e-06	10.6247	11	36	0.0180624
detection of light stimulus	4	1.79317e-26	4.50803e-23	24.9568	25	0.0322165	8	5.75288e-06	9.07089	12	46	0.0197044
retina development in camera-type eye	5	8.65702e-24	1.7411e-20	7.30183	44	0.056701	5	1.9892e-06	5.6467	19	117	0.0311987
response to light stimulus	6	5.03143e-16	8.43268e-13	5.37627	37	0.0476804	12	8.78986e-05	3.76837	22	203	0.0361248
camera-type eye development	7	1.11838e-15	1.60664e-12	3.71675	53	0.068299	9	4.32137e-05	3.47718	26	260	0.0426929
eye development	8	2.28109e-14	2.86733e-11	3.29954	56	0.072165	10	5.55505e-05	3.23458	28	301	0.045977
detection of abiotic stimulus	9	6.5008e-13	7.26357e-10	6.42962	25	0.0322165	35	0.00292436	4.63623	12	90	0.0197044
photoreceptor cell development	10	8.9579e-13	9.00806e-10	9.22536	19	0.0244845	14	0.000100521	8.69294	10	40	0.0164204
detection of visible light	11	1.84865e-12	1.69e-09	20.4756	12	0.0154639	31	0.00274302	9.0149	7	27	0.0114942
microtubule-based process	12	7.16031e-12	6.00034e-09	3.43584	43	0.0554124	11	6.44186e-05	2.86152	33	401	0.0541872
detection of external stimulus	13	8.89288e-12	6.87899e-09	5.68174	25	0.0322165	63	0.00944128	3.89964	12	107	0.0197044
phototransduction, visible light	14	1.73565e-11	1.24669e-08	25.2423	10	0.0128866	74	0.0122105	10.227	5	17	0.00821018
cellular localization	15	4.6344e-11	3.1069e-08	2.0242	98	0.126289	7	4.91469e-06	2.02347	76	1306	0.124795
photoreceptor cell differentiation	17	1.0339e-10	6.1158e-08	6.95409	19	0.0244845	19	0.000568803	7.09628	10	49	0.0164204
response to radiation	18	1.46102e-10	8.16224e-08	3.48308	37	0.0476804	69	0.0105406	2.52468	22	303	0.0361248
protein localization	20	1.16668e-09	5.86604e-07	2.01876	85	0.109536	17	0.000467504	1.87566	65	1205	0.106732
eye photoreceptor cell development	22	1.48404e-09	6.78342e-07	8.00158	15	0.0193299	50	0.00568904	7.60632	7	32	0.0114942
establishment of localization in cell	25	3.00794e-09	1.20991e-06	2.02909	80	0.103093	13	8.30725e-05	2.02427	62	1065	0.101806
Group A Independent
# GREAT version 3.0.0	Species assembly: mm9	Association rule: Single nearest gene: 1000000000 bp max extension, curated regulatory domains included
# Term Name	Binom Rank	Binom Raw P-Value	Binom FDR Q-Val	Binom Fold Enrichment	Binom Observed Region Hits	Binom Region Set Coverage	Hyper Rank	Hyper FDR Q-Val	Hyper Fold Enrichment	Hyper Observed Gene Hits	Hyper Total Genes	Hyper Gene Set Coverage
sensory perception of light stimulus	20	8.10888e-21	4.07715e-18	4.45418	60	0.0245399	29	2.0056e-12	3.79375	42	116	0.0207818
protein transport	21	1.03434e-20	4.95301e-18	2.10052	188	0.0768916	23	1.65192e-13	1.91494	159	870	0.0786739
retina homeostasis	22	4.17153e-20	1.90677e-17	9.46114	31	0.0126789	57	7.86957e-08	5.98742	16	28	0.00791687
visual perception	23	6.53347e-20	2.85655e-17	4.39534	58	0.0237219	30	3.74533e-12	3.80174	41	113	0.020287
establishment of protein localization	25	1.88266e-19	7.5728e-17	2.03692	189	0.0773006	27	7.80258e-13	1.87525	160	894	0.0791687
photoreceptor cell maintenance	28	9.13791e-18	3.28182e-15	9.51108	27	0.0110429	61	2.92513e-07	6.3779	14	23	0.00692726
RNA processing	32	6.29571e-16	1.97843e-13	2.36234	111	0.0453988	56	4.04839e-08	1.89819	100	552	0.0494805
peptidyl-lysine modification	38	2.47155e-13	6.54049e-11	3.87114	43	0.0175869	91	4.5362e-05	2.57919	32	130	0.0158338
photoreceptor cell differentiation	41	5.69382e-13	1.39651e-10	4.29805	37	0.0151329	72	6.00839e-06	4.06289	19	49	0.00940129
detection of light stimulus	48	3.92305e-12	8.2188e-10	6.97036	22	0.00899796	80	1.03758e-05	4.10008	18	46	0.00890648
eye photoreceptor cell differentiation	49	7.0882e-12	1.45467e-09	4.23626	34	0.0139059	93	4.88881e-05	4.08897	16	41	0.00791687
response to light stimulus	54	2.19614e-11	4.0897e-09	2.72091	59	0.0241309	75	8.18994e-06	2.32271	45	203	0.0222662
phototransduction	56	4.45139e-11	7.99343e-09	7.36791	19	0.00777096	89	4.25117e-05	4.36583	15	36	0.00742207
histone modification	58	2.70975e-10	4.69815e-08	2.4768	62	0.0253579	101	0.000138577	2.02134	49	254	0.0242454
intracellular protein transport	59	2.95394e-10	5.03472e-08	2.04201	93	0.0380368	69	1.49528e-06	1.93943	77	416	0.0381
covalent chromatin modification	62	4.35597e-10	7.0651e-08	2.44591	62	0.0253579	106	0.000187533	1.99775	49	257	0.0242454
internal protein amino acid acetylation	63	4.8134e-10	7.6831e-08	3.77458	32	0.0130879	92	4.82511e-05	2.89817	26	94	0.0128649
cellular protein catabolic process	64	6.26928e-10	9.85061e-08	2.1675	78	0.0319018	86	1.65683e-05	1.97457	62	329	0.0306779
microtubule-based process	65	6.82725e-10	1.05623e-07	2.10487	83	0.0339468	185	0.00960035	1.59391	61	401	0.0301831
protein acylation	66	7.14806e-10	1.0891e-07	3.38756	36	0.0147239	104	0.000159758	2.51471	30	125	0.0148441

## Sheet: Group C
Group C Dependent
# GREAT version 3.0.0	Species assembly: mm9	Association rule: Single nearest gene: 1000000000 bp max extension, curated regulatory domains included
# Term Name	Binom Rank	Binom Raw P-Value	Binom FDR Q-Val	Binom Fold Enrichment	Binom Observed Region Hits	Binom Region Set Coverage	Hyper Rank	Hyper FDR Q-Val	Hyper Fold Enrichment	Hyper Observed Gene Hits	Hyper Total Genes	Hyper Gene Set Coverage
cilium organization	12	8.77261e-07	0.000735145	3.8998	19	0.0190381	42	0.0118033	3.29536	15	119	0.0185185
cilium assembly	16	2.5311e-06	0.0015908	3.97459	17	0.0170341	34	0.00557938	3.77325	14	97	0.0172839
cilium morphogenesis	18	4.21576e-06	0.00235521	3.35906	20	0.0200401	28	0.00347379	3.41873	17	130	0.0209877
microtubule-based process	19	4.54189e-06	0.00240385	2.29878	37	0.0370742	85	0.0462788	1.95585	30	401	0.037037
peptidyl-serine phosphorylation	25	8.9669e-06	0.00360685	4.00044	15	0.0150301	55	0.0202919	3.88615	11	74	0.0135803
peptidyl-serine modification	55	4.03511e-05	0.00737764	3.33568	16	0.0160321	54	0.0191334	3.64789	12	86	0.0148148
regulation of myeloid cell differentiation	75	0.000116106	0.0155675	2.44376	23	0.0230461	56	0.019985	2.83079	17	157	0.0209877
negative regulation of insulin receptor signaling pathway	80	0.000133041	0.0167233	6.46645	7	0.00701403	79	0.0433949	7.68918	5	17	0.00617284
establishment of organelle localization	116	0.000273589	0.0237173	2.47074	20	0.0200401	60	0.0235634	2.88477	16	145	0.0197531
positive regulation of myeloid cell differentiation	140	0.00038863	0.0279147	2.96385	14	0.0140281	76	0.0416776	3.73474	10	70	0.0123457
neuron cellular homeostasis	167	0.000640257	0.0385535	18.3759	3	0.00300601	43	0.0130416	26.1432	3	3	0.0037037
organelle localization	186	0.000924119	0.0499621	2.06101	24	0.0240481	87	0.0485507	2.38808	19	208	0.0234568
Group C Independent
# GREAT version 3.0.0	Species assembly: mm9	Association rule: Single nearest gene: 1000000000 bp max extension, curated regulatory domains included
# Term Name	Binom Rank	Binom Raw P-Value	Binom FDR Q-Val	Binom Fold Enrichment	Binom Observed Region Hits	Binom Region Set Coverage	Hyper Rank	Hyper FDR Q-Val	Hyper Fold Enrichment	Hyper Observed Gene Hits	Hyper Total Genes	Hyper Gene Set Coverage
actin-mediated cell contraction	1	1.38822e-08	0.000139599	10.6105	11	0.00970874	84	0.0247247	8.33832	5	14	0.00551268
aspartate transport	12	1.38207e-05	0.0115818	12.0291	6	0.00529567	44	0.0106962	15.5649	4	6	0.00441014
C4-dicarboxylate transport	13	1.70297e-05	0.0131731	11.5866	6	0.00529567	65	0.0163198	13.3413	4	7	0.00441014
cell-cell junction organization	14	2.43239e-05	0.0174715	3.193	18	0.015887	64	0.0162273	3.41028	13	89	0.014333
glycoprotein biosynthetic process	19	5.93429e-05	0.031408	2.1104	34	0.0300088	96	0.0294599	2.28285	22	225	0.0242558
cell junction organization	22	8.32671e-05	0.0380606	2.89508	18	0.015887	101	0.0305355	3.06581	13	99	0.014333

## Sheet: Group D
Group D Dependent
# GREAT version 3.0.0	Species assembly: mm9	Association rule: Single nearest gene: 1000000000 bp max extension, curated regulatory domains included
# Term Name	Binom Rank	Binom Raw P-Value	Binom FDR Q-Val	Binom Fold Enrichment	Binom Observed Region Hits	Binom Region Set Coverage	Hyper Rank	Hyper FDR Q-Val	Hyper Fold Enrichment	Hyper Observed Gene Hits	Hyper Total Genes	Hyper Gene Set Coverage
no terms significantly associated
Group D Independent
# GREAT version 3.0.0	Species assembly: mm9	Association rule: Single nearest gene: 1000000000 bp max extension, curated regulatory domains included
# Term Name	Binom Rank	Binom Raw P-Value	Binom FDR Q-Val	Binom Fold Enrichment	Binom Observed Region Hits	Binom Region Set Coverage	Hyper Rank	Hyper FDR Q-Val	Hyper Fold Enrichment	Hyper Observed Gene Hits	Hyper Total Genes	Hyper Gene Set Coverage
no terms significantly associated
